# Supplementary material for: Tongue Sole CD209: A Pattern-Recognition Receptor that Binds a Broad Range of Microbes and Promotes Phagocytosis
Source: MDPI journal article supplement (doi:10.3390/ijms18091848), 2017-09-04
Supplement: s1 [file s1]

## Supplementary Figures

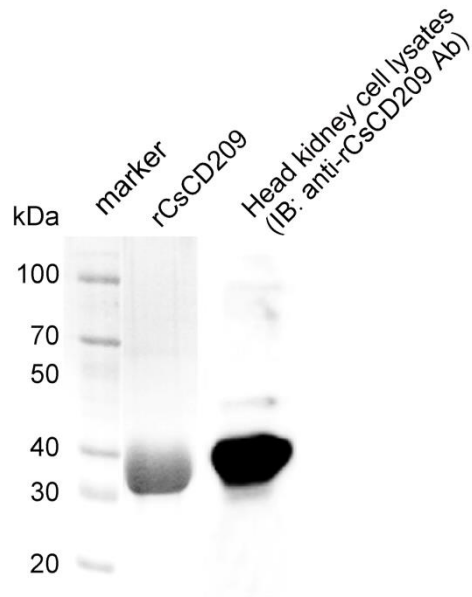

**Figure S1.** SDS-PAGE analysis of purified rCsCD209 and Western blot analysis of anti-rCsCD209 antibodies. rCsCD209 was expressed and purified by Ni-NTA chromatography, and further separated by SDS-PAGE. Western blot was performed to detect the CsCD209 in head kidney leukocytes by polyclonal antibodies against rCsCD209.

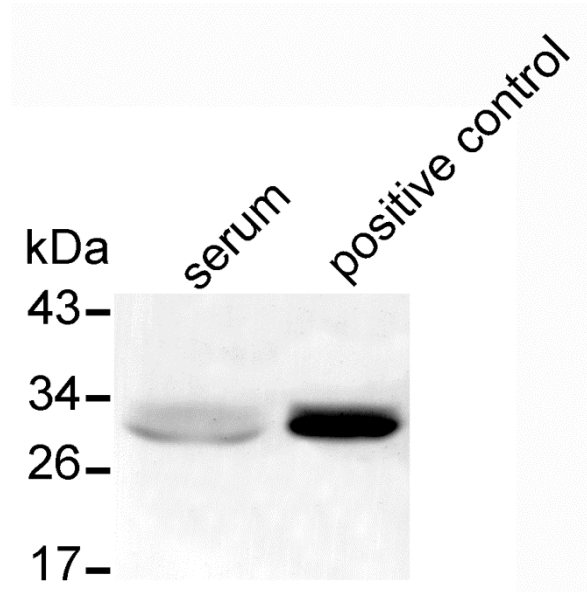

**Figure S2.** The soluble CsCD209 examined by Western blot. Serum protein was separated by SDS-PAGE, transferred to Polyvinylidene fluoride (PVDF) membrane and immunoblotted by anti-rCsCD209 antibody. Head kidney leukocyte proteins were used as a positive control.

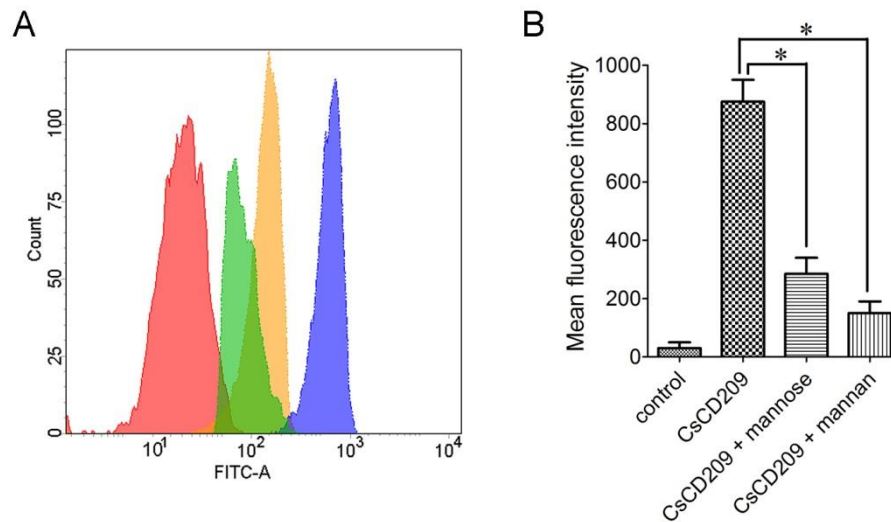

**Figure S3.** Effects of mannose and mannan on rCsCD209 binding to bacteria. **(A)** rCsCD209 was preincubated with or without mannose or mannan before incubating with *Edwardsiella tarda*. The cells were treated with FITC-labeled anti-His antibody, and rCsCD209-bacteria binding was determined by flow cytometry. Red histogram: control; blue histogram: rCsCD209; yellow histogram: rCsCD209<sup>+</sup> mannose; green histogram: rCsCD209<sup>+</sup> mannan. **(B)** The mean fluorescence intensity in **(A)** was statistically calculated. Results are means  $\pm$  SEM (n = 3), \*  $p < 0.05$ .
